# Supplementary material
Source: ML conference proceedings conference paper supplement (https://openreview.net/forum?id=73Q9U0vcja)

no prior

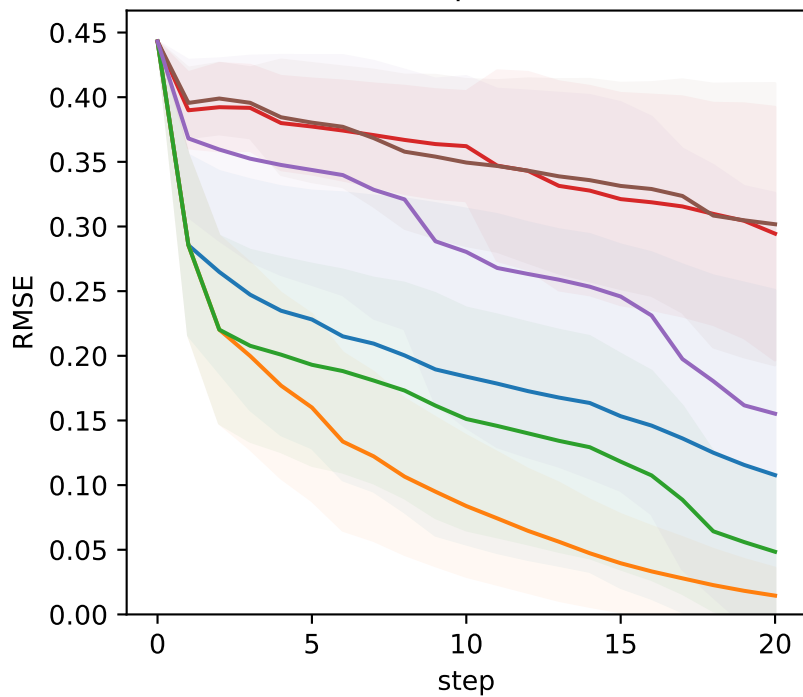

low resolution prior

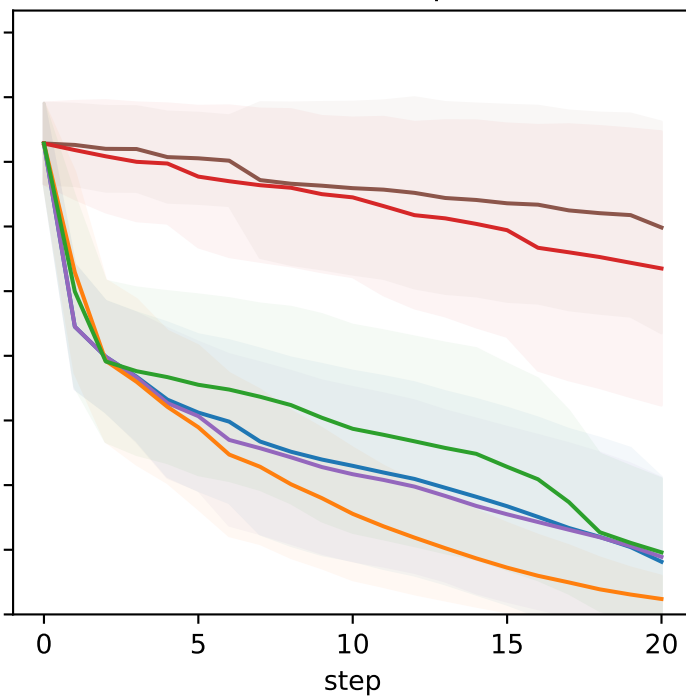

unet prior

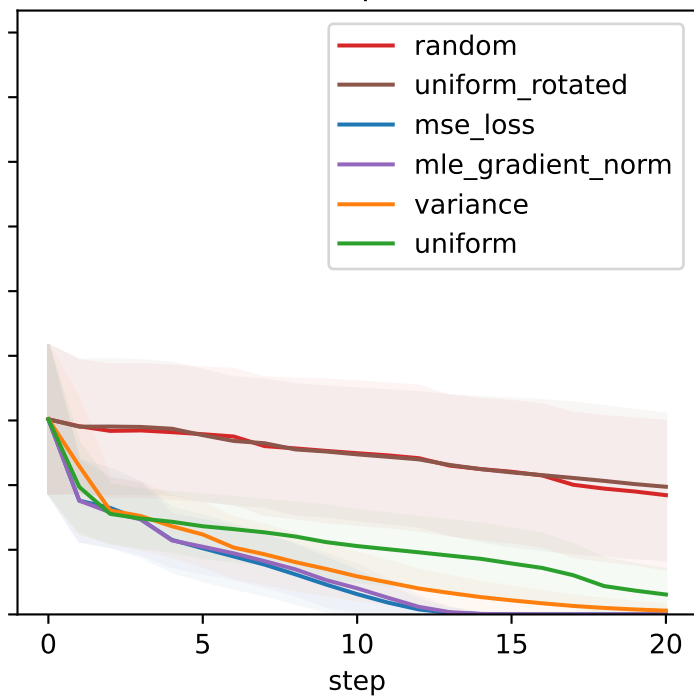

no prior

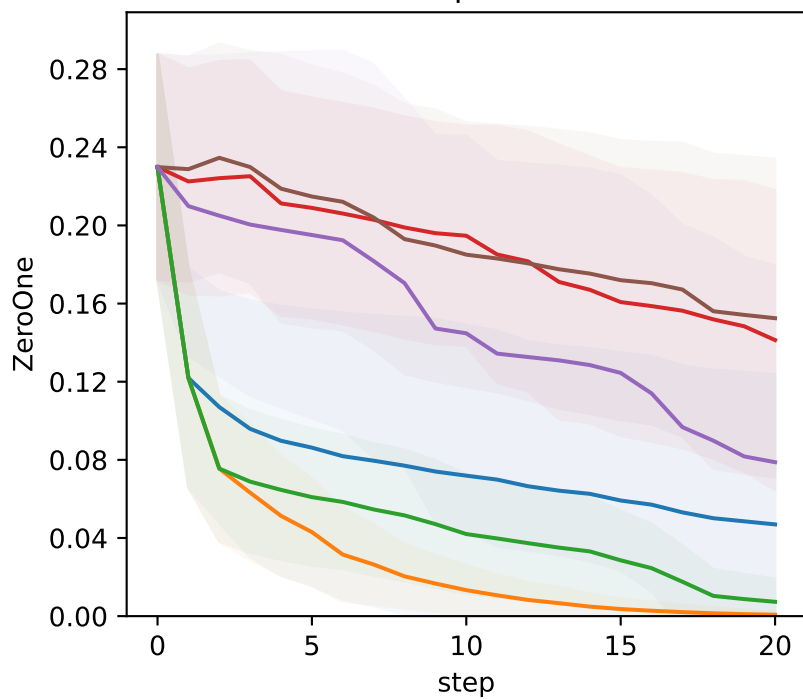

low resolution prior

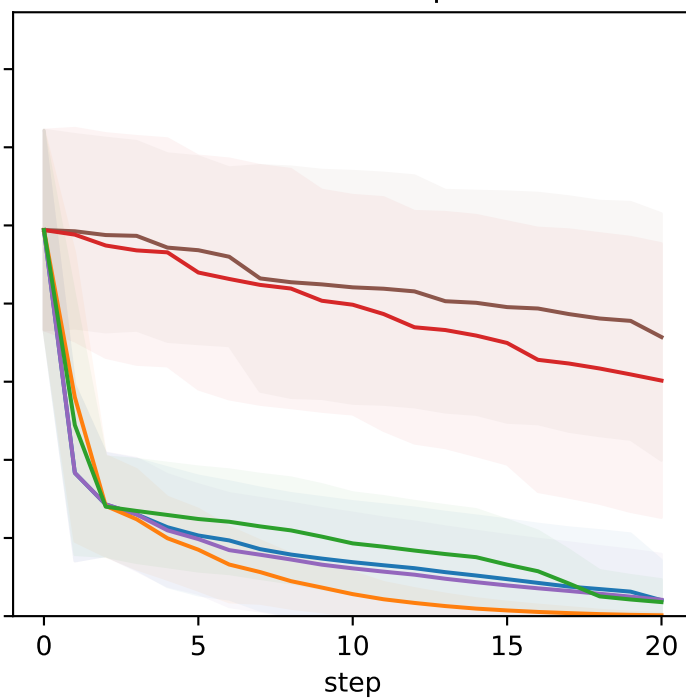

unet prior

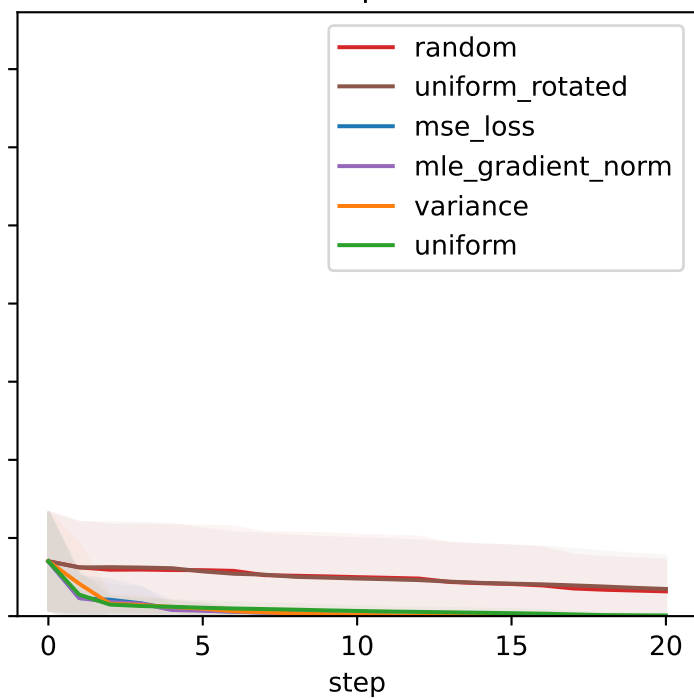

no prior

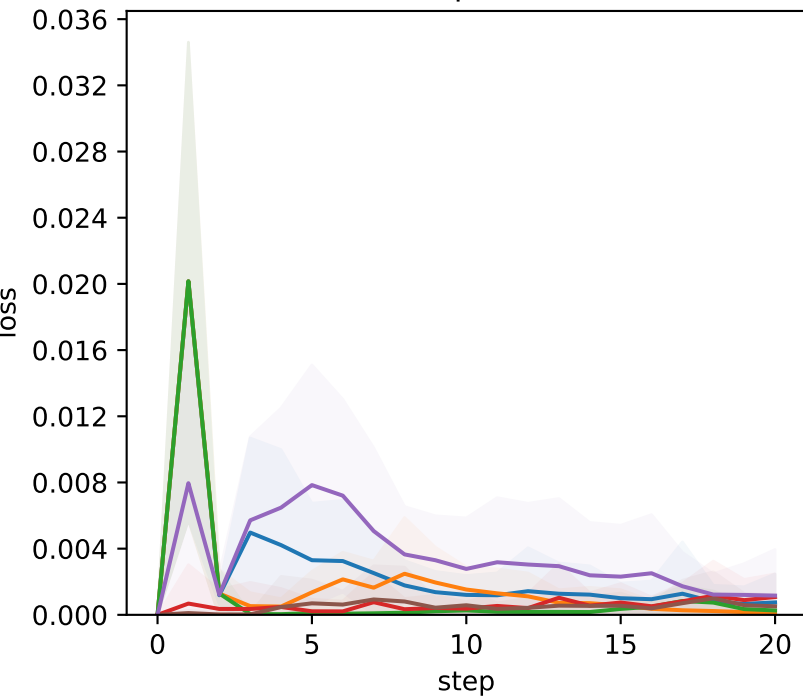

low resolution prior

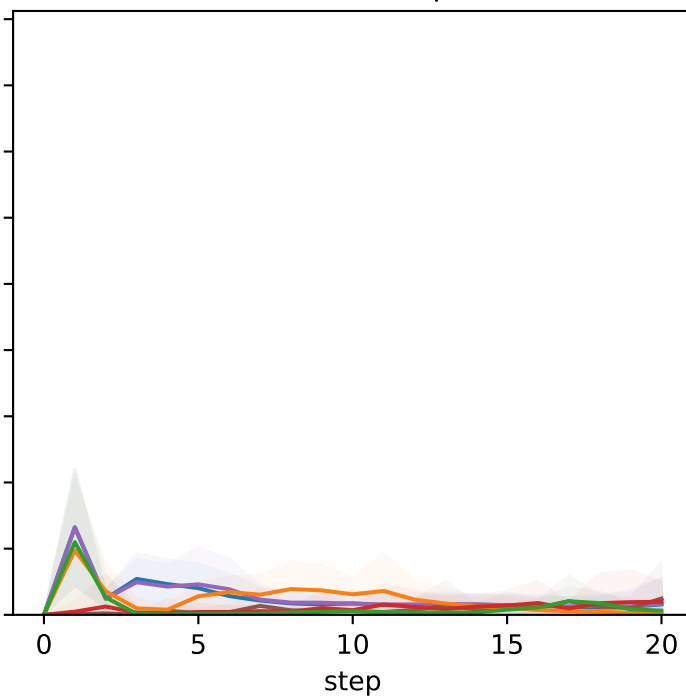

unet prior

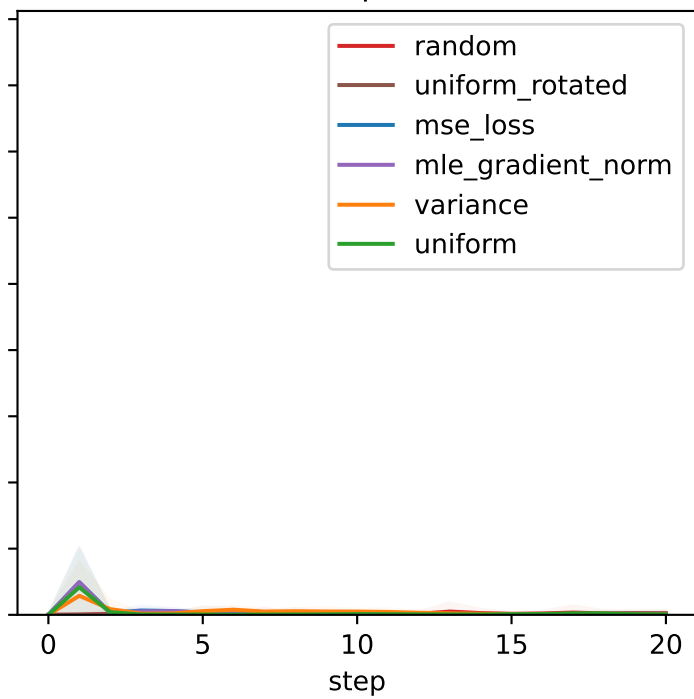

Supplement: supplementary_material [file attachment]
