# Supplementary material
Source: ML conference proceedings conference paper supplement (https://openreview.net/forum?id=73Q9U0vcja)

prior: lr, acquisition Function: variance

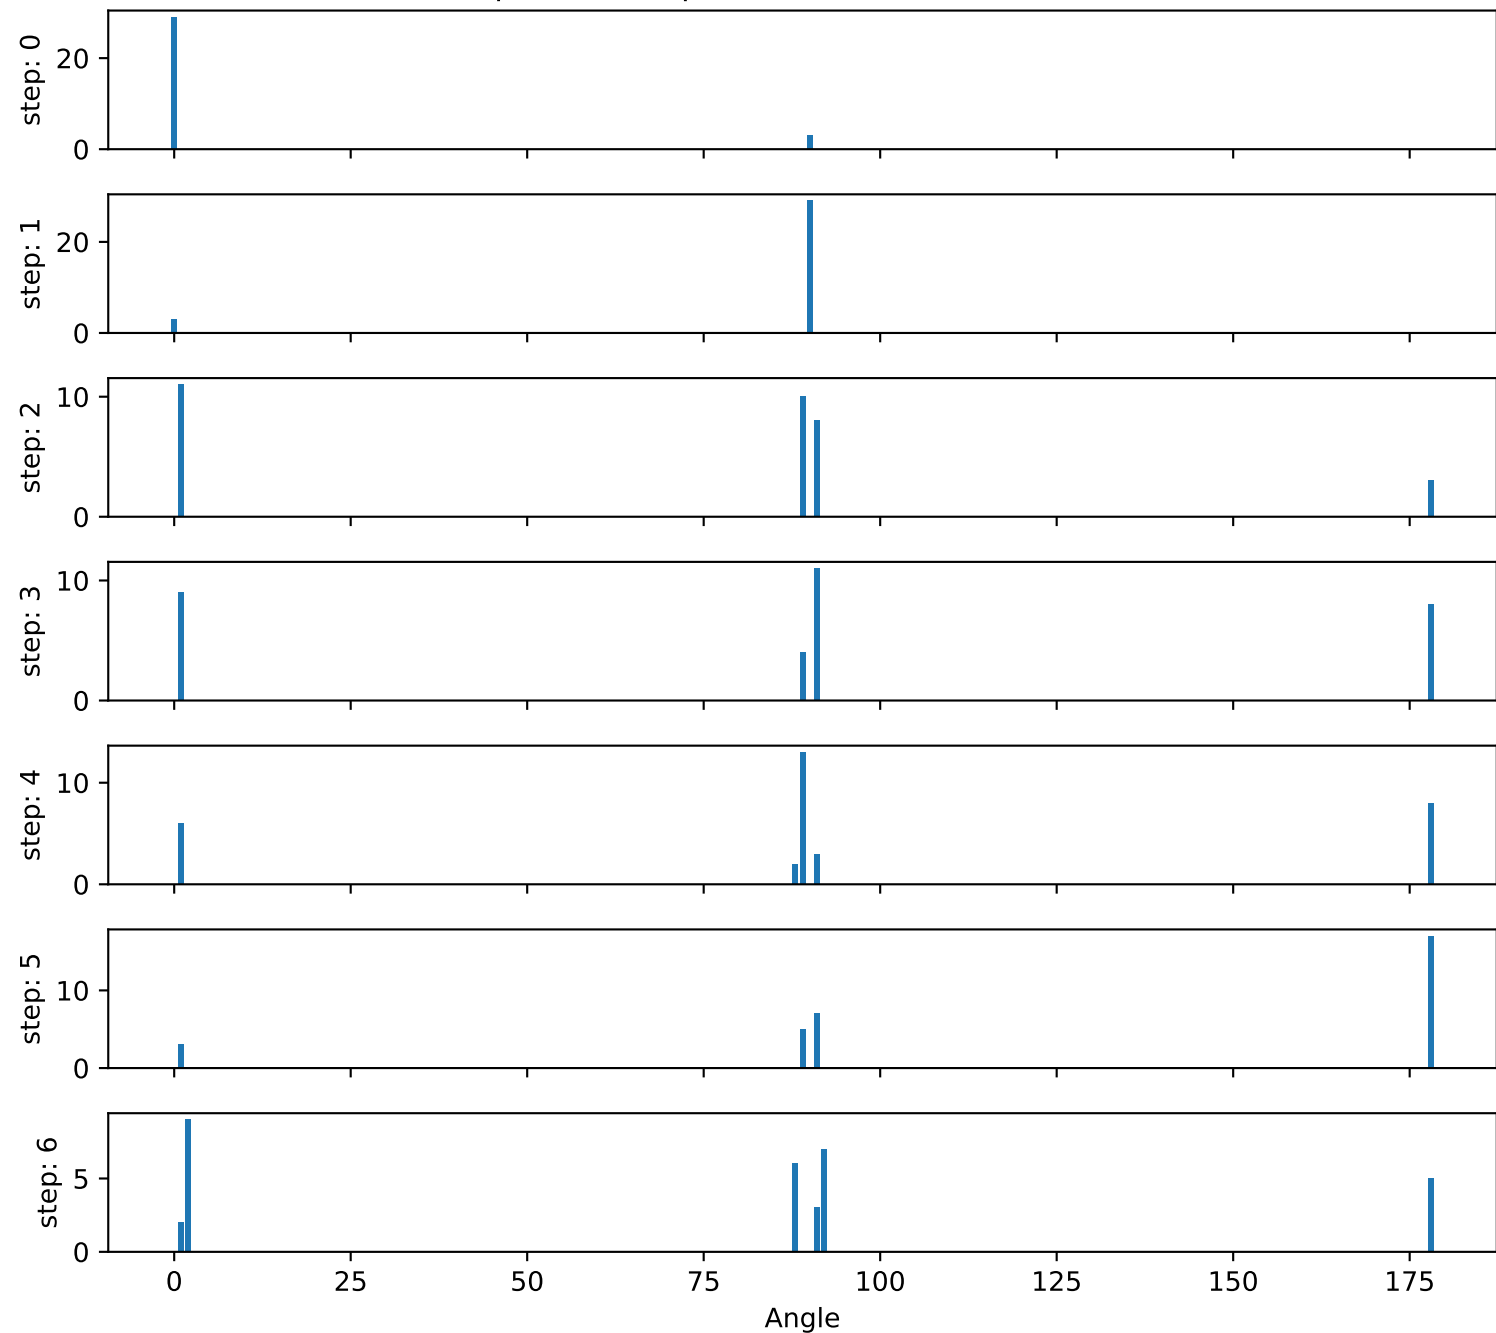

Supplement: supplementary_material [file attachment]
